# Supplementary material
Source: HighWire-hosted journal article supplement (https://jnm.snmjournals.org/highwire/filestream/94990/field_highwire_adjunct_files/0/175398_Supplemental_Data.pdf)

### Supplemental Figure 1

The anatomy of the automated anatomical labeling (AAL) template VOIs corresponding to the spatially normalized brain PET.

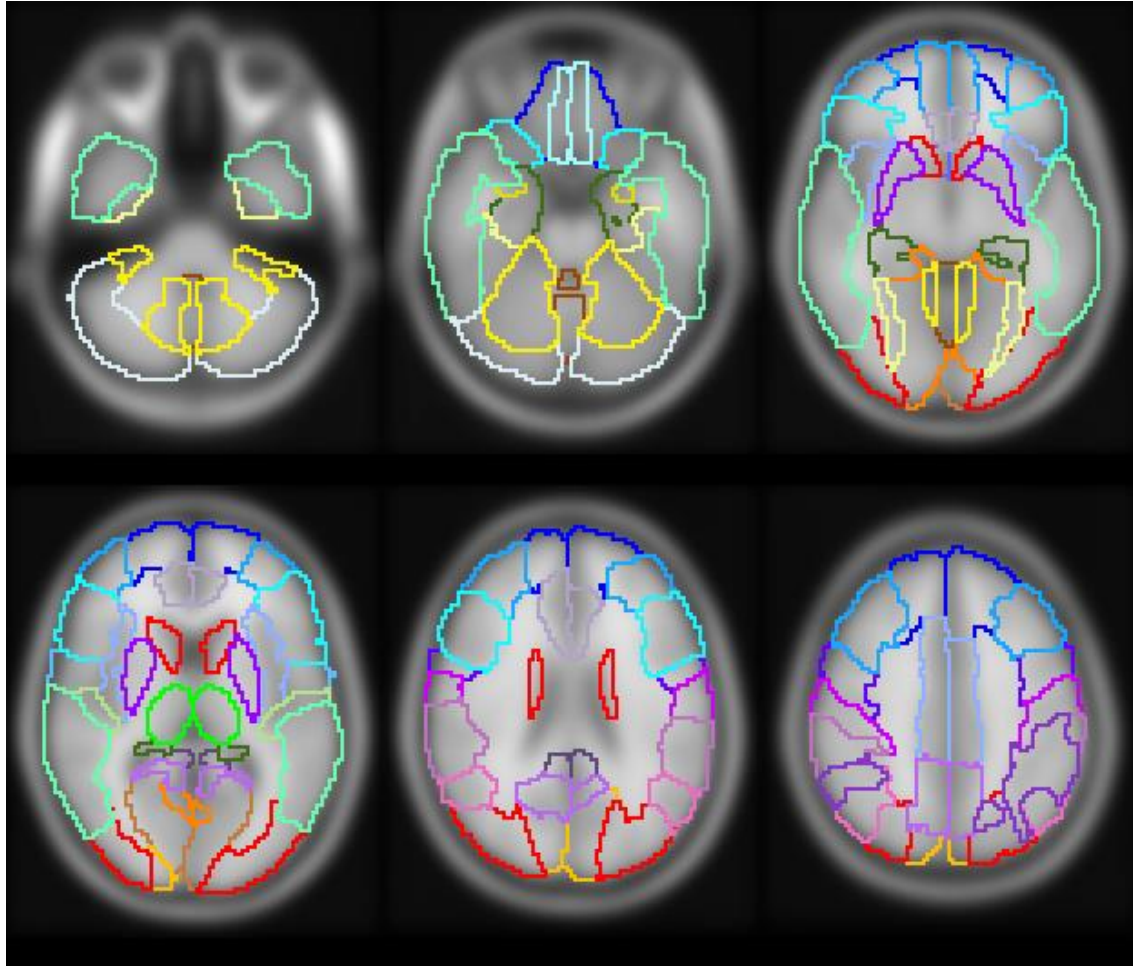

## Supplemental Figure 2

3D illustration of merged VOIs. Frontal lobe is blue, temporal lobe is green, occipital lobe is red, parietal lobe is purple, Insula and Cingulate Gyri is brown, central structure is yellow, and cerebellum is sky blue.

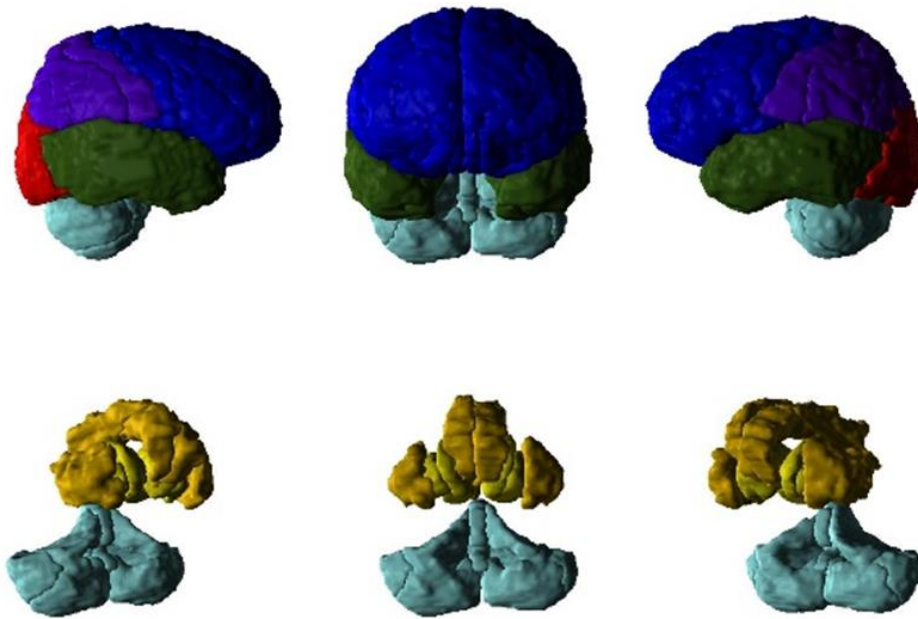

Supplement: 175398_Supplemental_Data.pdf [file 175398_Supplemental_Data.pdf]
